# Supplementary material for: EGFR-Mediated Carcinoma Cell Metastasis Mediated by Integrin αvβ5 Depends on Activation of c-Src and Cleavage of MUC1
Source: PubMed Central journal article supplement (PMC3346745; doi:10.1371/journal.pone.0036753), 2012-05-07

**Fig. S1**

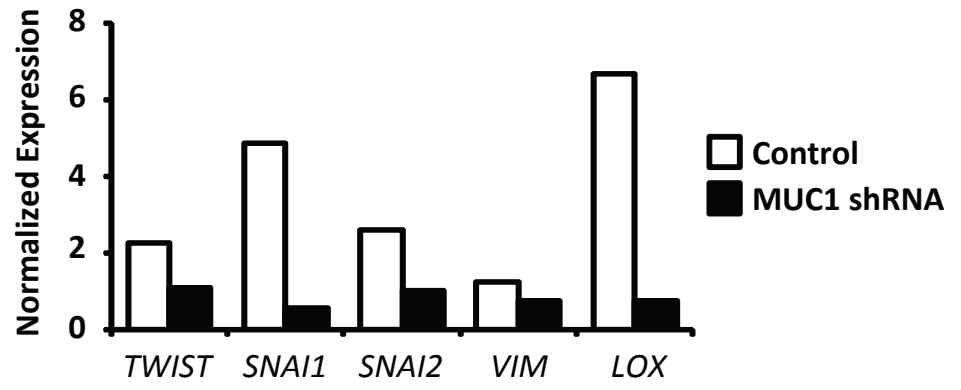

Supplement: pone.0036753.s001.pdf [file pone.0036753.s001.pdf]
